# Supplementary material for: CXCL16/CXCR6 Axis in Adipocytes Differentiated from Human Adipose Derived Mesenchymal Stem Cells Regulates Macrophage Polarization
Source: MDPI journal article supplement (doi:10.3390/cells10123410), 2021-12-03
Supplement: s1 [file s1]

## Supplementary figure and figure legend

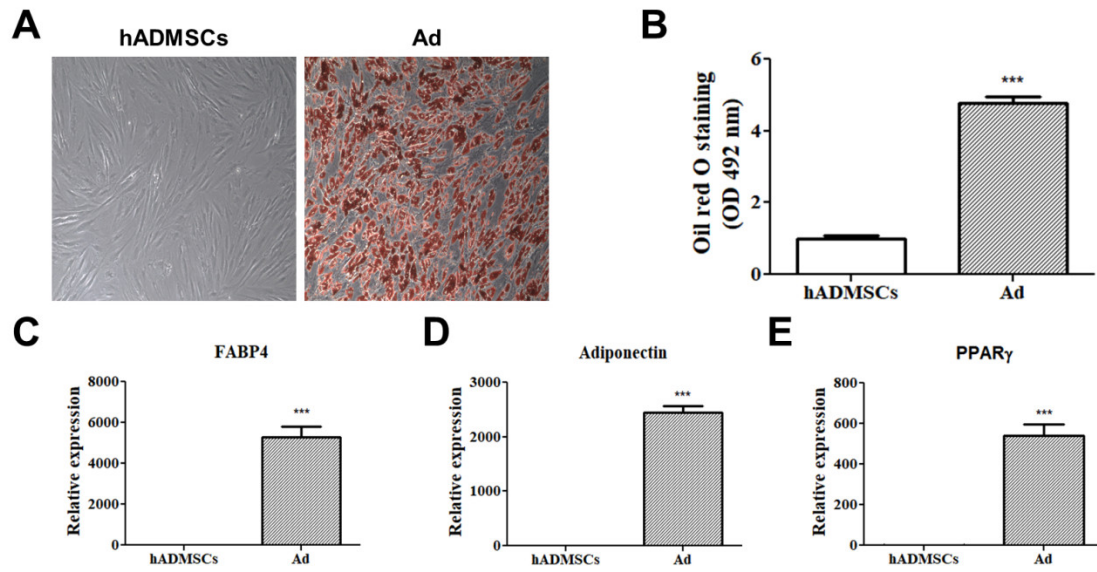

**Figure S1.** Validation of adipogenic differentiation of adipocytes from hADMSCs. (A) ORO-stained lipid droplets in differentiated adipocytes and hADMSCs. (B) Relative quantification of lipid droplets in differentiated Adipocytes and hADMSCs.  $n = 4$  trial per samples and control. Gene expression levels of adipogenic differentiation markers (C) FABP4, (D) Adiponectin, and (E) PPAR $\gamma$  on hADMSCs and differentiated adipocytes.  $n = 3$  trials per samples and control. \*\*\*  $p < 0.001$  indicates statistically significant compared with the hADMSCs group.
